# Supplementary material for: Phytochemical profiles and the hypoglycemic effects of tree peony seed coats
Source: Royal Society of Chemistry journal article supplement (doi:10.1039/d1fo02341a), 2021-01-01

**Phytochemical profiles and their hypoglycemic effects of tree peony seed coats**

Zenggen Liu<sup>a\*</sup>, Mingzhu Li<sup>a</sup>, Dawen Qian<sup>a</sup>, Zheng'an Liu<sup>b</sup>, Qingyan Shu<sup>b\*</sup>

<sup>a</sup> Qinghai Provincial Key Laboratory of Tibetan Medicine Research and Key Laboratory of Tibetan Medicine Research, Northwest Institute of Plateau Biology, CAS, Xining 810001, China

<sup>b</sup> Key Laboratory of Plant Resources/Beijing Botanical Garden, Institute of Botany, CAS, Beijing 100093, China

---

\* Corresponding authors. Tel/Fax: +86 971 6143282, E-mail address: lzg@nwipb.ac.cn (ZG Liu), shuqy@ibcas.ac.cn (QY Shu). Addresses for other authors: 695469402@qq.com (MZ Li), dwqian@nwipb.ac.cn (DW Qian), liuzhengan@ibcas.ac.cn (ZA Liu).

**Table S1** Phytochemical composition and content (mg/g) in seed coats of three tree peonies (*POSC*, *PDSC* and *PLSC*) located from different production regions.

| No. | RD         | PF        | EG        | SA         | SB           | VF         | AD           | UN I       | UN II      |
|-----|------------|-----------|-----------|------------|--------------|------------|--------------|------------|------------|
| S1  | 0.31±0.10  | 0.56±0.11 | 0.54±0.12 | 24.37±2.53 | 209.17±23.60 | 30.96±3.03 | 113.24±9.77  | 47.70±5.50 | 32.10±2.32 |
| S2  | 0.30±0.05  | 0.37±0.04 | -         | 25.86±1.95 | 227.17±18.77 | 47.23±2.26 | 145.75±12.52 | 12.84±2.21 | 46.55±3.44 |
| S3  | 0.15±0.06  | 0.53±0.12 | -         | 23.09±2.76 | 197.38±22.18 | 34.83±3.12 | 177.12±24.61 | 16.94±1.99 | 42.72±2.94 |
| S4  | 0.08±0.02  | 0.40±0.07 | -         | 24.05±3.07 | 209.17±9.80  | 55.93±3.67 | 181.24±18.92 | 8.14±1.24  | 47.12±3.40 |
| S5  | 0.12±0.03  | 0.42±0.05 | 0.49±0.10 | 21.52±1.18 | 187.99±12.86 | 28.77±2.27 | 119.37±8.67  | 28.06±2.34 | 32.12±1.95 |
| S6  | 0.01±0.00  | 0.59±0.14 | 0.16±0.02 | 25.92±3.34 | 232.99±30.67 | 41.96±2.90 | 162.76±10.02 | 11.29±1.29 | 47.38±3.41 |
| S7  | 0.32±0.14  | 0.47±0.10 | 0.07±0.01 | 16.15±2.10 | 132.46±14.29 | 71.77±5.24 | 115.97±6.50  | 19.31±1.05 | 26.74±1.66 |
| S8  | 0.12±0.05  | 0.45±0.08 | 0.26±0.04 | 27.44±3.17 | 240.43±25.40 | 35.78±1.80 | 145.57±13.51 | 23.82±1.81 | 39.55±2.73 |
| S9  | 0.16±0.02  | 0.51±0.12 | 0.05±0.01 | 23.57±2.06 | 199.65±21.69 | 52.88±4.31 | 108.41±9.75  | 34.47±2.94 | 31.97±2.01 |
| S10 | 0.64±0.15  | 0.34±0.03 | 1.87±0.24 | 25.83±1.92 | 216.82±17.92 | 43.45±2.99 | 105.58±10.04 | 28.73±1.12 | 35.46±1.97 |
| S11 | 0.58±0.22  | 0.46±0.05 | 0.87±0.22 | 24.07±2.30 | 197.11±15.33 | 54.44±3.27 | 100.95±12.38 | 13.16±1.50 | 36.20±2.25 |
| S12 | 0.26±0.07  | 0.42±0.05 | 3.24±0.57 | 20.51±1.18 | 190.63±8.96  | 62.45±5.00 | 140.31±12.67 | 26.26±1.33 | 35.59±1.59 |
| S13 | 0.18±0.00  | 0.25±0.07 | -         | 18.11±1.37 | 156.07±23.07 | 32.98±1.66 | 154.67±19.18 | 38.38±2.94 | 35.15±2.92 |
| S14 | 0.25±0.02  | 0.66±0.12 | 3.96±0.53 | 21.76±1.56 | 190.87±17.94 | 74.75±4.54 | 182.08±21.60 | 12.64±1.17 | 42.35±3.13 |
| S15 | 0.16±0.02  | 0.50±0.04 | 2.36±0.32 | 19.41±2.33 | 180.60±12.89 | 48.38±3.30 | 204.34±16.36 | 14.08±2.11 | 47.95±2.85 |
| S16 | 0.21±0.03  | 0.55±0.10 | 0.07±0.01 | 19.76±1.27 | 189.43±21.37 | 41.03±3.55 | 182.36±15.49 | 18.03±1.53 | 39.43±2.39 |
| S17 | 1.05±0.34  | 0.08±0.03 | 2.14±0.20 | 17.76±3.44 | 118.10±22.96 | 20.32±4.38 | 35.60±4.72   | 3.51±0.92  | 17.23±1.50 |
| S18 | 0.55±0.17  | 0.44±0.02 | 2.86±0.18 | 25.76±1.86 | 242.64±27.90 | 66.40±2.93 | 193.60±18.77 | 26.26±2.33 | 47.22±2.26 |
| S19 | 0.14±0.01  | 0.50±0.07 | -         | 19.96±2.39 | 169.97±18.72 | 34.90±3.12 | 77.75±7.04   | 60.17±5.28 | 21.40±1.52 |
| S20 | 0.21±0.02  | 0.65±0.06 | 0.07±0.02 | 29.16±2.16 | 278.26±16.40 | 20.25±3.65 | 154.37±11.29 | 7.35±7.04  | 46.60±3.60 |
| S21 | 9.26±2.20  | 0.05±0.01 | 0.25±0.04 | 7.04±1.04  | 35.11±4.29   | 12.50±1.72 | 100.50±6.53  | 4.14±1.02  | 15.89±1.87 |
| S22 | 6.86±1.87  | 0.06±0.01 | 0.19±0.03 | 7.50±0.92  | 42.33±3.95   | 4.21±0.88  | 76.00±5.49   | 4.20±0.88  | 14.50±1.29 |
| S23 | 1.96±0.63  | 0.22±0.04 | 0.19±0.02 | 0.69±0.24  | 2.93±0.77    | 8.23±1.42  | 99.87±3.92   | 3.87±1.30  | 14.84±0.98 |
| S24 | 14.91±2.69 | 0.08±0.02 | 0.18±0.04 | 0.31±0.09  | 0.69±0.16    | 0.91±0.28  | 155.01±14.68 | 5.17±0.94  | 22.70±1.07 |
| S25 | 6.29±1.08  | 0.10±0.00 | 0.03±0.00 | 2.96±0.84  | 9.86±1.30    | 0.27±0.05  | 14.49±2.05   | 1.03±0.37  | 11.00±0.84 |
| S26 | 1.85±0.75  | 0.04±0.01 | -         | -          | -            | 0.08±0.02  | 38.63±4.08   | 1.71±0.45  | 12.64±1.16 |

RD: (E)-resveratrol 3,5-O-β-diglucoside, PF: paeoniflorin, EG: ethyl gallate, SA: suffruticosol A, SB: suffruticosol B, VF: trans-ε-viniferin, AD: ampelopsin D, UN I: Unidentified I, UN II: Unidentified II.

The symbol (-) presents that it is below the detection limit.

**Table S2** Pearson correlation coefficients among the main phytochemical contents of *Paeonia* seed coats.

| Phytochemicals                                            | RD       | PF      | EG      | SA      | SB      | VF      | AD      | UN I  | UN II |
|-----------------------------------------------------------|----------|---------|---------|---------|---------|---------|---------|-------|-------|
| (E)-resveratrol 3,5- <i>O</i> - $\beta$ -diglucoside (RD) | 1.000    |         |         |         |         |         |         |       |       |
| Paeoniflorin (PF)                                         | -0.673** | 1.000   |         |         |         |         |         |       |       |
| Ethyl gallate (EG)                                        | -0.199   | 0.201   | 1.000   |         |         |         |         |       |       |
| Suffruticosol A (SA)                                      | -0.716** | 0.802** | 0.235   | 1.000   |         |         |         |       |       |
| Suffruticosol B (SB)                                      | -0.723** | 0.834** | 0.239   | 0.989** | 1.000   |         |         |       |       |
| trans- $\epsilon$ -Viniferin (VF)                         | -0.618** | 0.711** | 0.506** | 0.701** | 0.706** | 1.000   |         |       |       |
| Ampelopsin D (AD)                                         | -0.245   | 0.630** | 0.252   | 0.519** | 0.591** | 0.572** | 1.000   |       |       |
| Unidentified I (UN I)                                     | -0.428*  | 0.461*  | 0.028   | 0.473*  | 0.470*  | 0.370   | 0.122   | 1.000 |       |
| Unidentified II (UN II)                                   | -0.551** | 0.781** | 0.266   | 0.829** | 0.876** | 0.694** | 0.856** | 0.199 | 1.000 |

\*\* .  $P < 0.01$ , correlation is significant at the 0.01 level (2-tailed).

\* .  $P < 0.05$ , correlation is significant at the 0.05 level (2-tailed).

**Table S3** Inhibitory effects of acarbose and the main compounds of *Paeonia* seed coats on  $\alpha$ -glucosidase

| Compound no. | Name/description                                     | IC <sub>50</sub> ( $\mu$ M) |
|--------------|------------------------------------------------------|-----------------------------|
|              | Acarbose                                             | 0.022 $\pm$ 0.0026          |
| 1            | (E)-resveratrol 3,5- <i>O</i> - $\beta$ -diglucoside | >3000                       |
| 2            | Paeoniflorin                                         | >3000                       |
| 3            | Ethyl gallate                                        | >3000                       |
| 4            | Suffruticosol A                                      | 12.44 $\pm$ 1.10            |
| 5            | Suffruticosol B                                      | 12.55 $\pm$ 1.11            |
| 6            | trans- $\epsilon$ -Viniferin                         | 7.75 $\pm$ 0.85             |
| 7            | Ampelopsin D                                         | 3.92 $\pm$ 0.27             |
| 8            | Vateriferol                                          | 3.01 $\pm$ 0.18             |
| 9            | 4-hydroxybenzoic acid                                | >3000                       |
| 10           | 4-hydroxybenzal-dehyde                               | >3000                       |
| 11           | Unidentified I                                       | >3000                       |
| 12           | Unidentified II                                      | >3000                       |

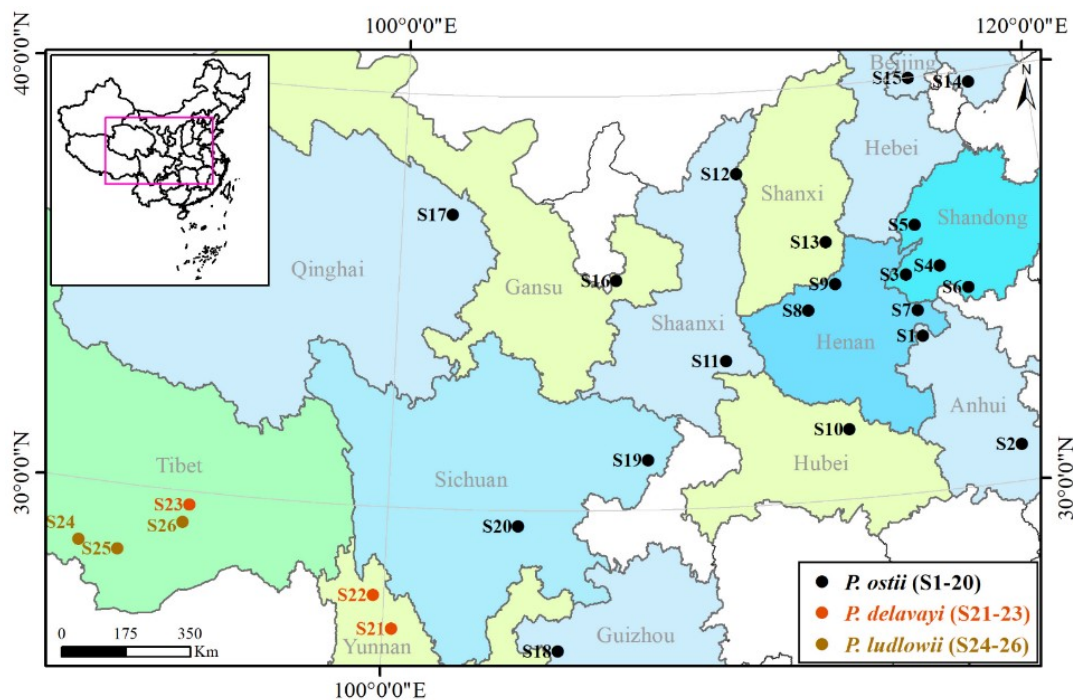

**Fig. S1.** Geographic distribution of different sampled positions of *Paeonia* plants. Names of the numbered positions were listed in **Table 1**.

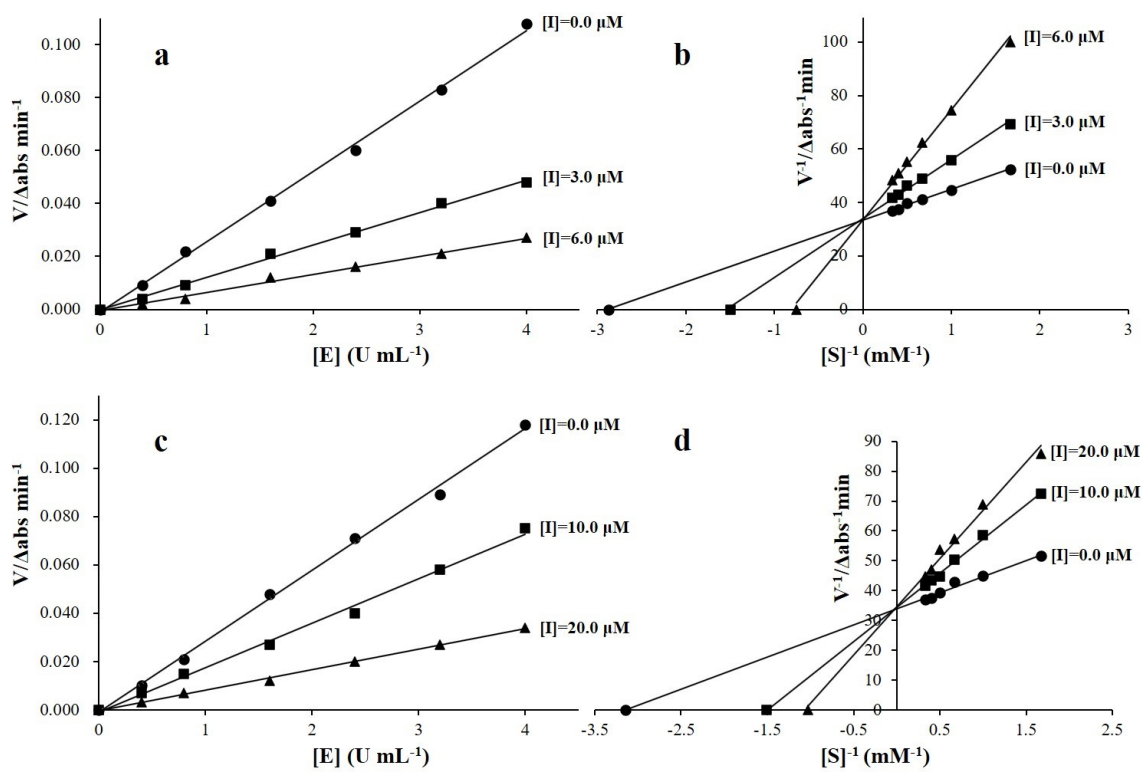

**Fig. S2.** Inhibition mechanism of ampelopsin D (a) and suffruticosol B (c) on  $\alpha$ -glucosidase and Lineweaver-Burk plots for the inhibition of  $\alpha$ -glucosidase by ampelopsin D (b) and suffruticosol B (d).

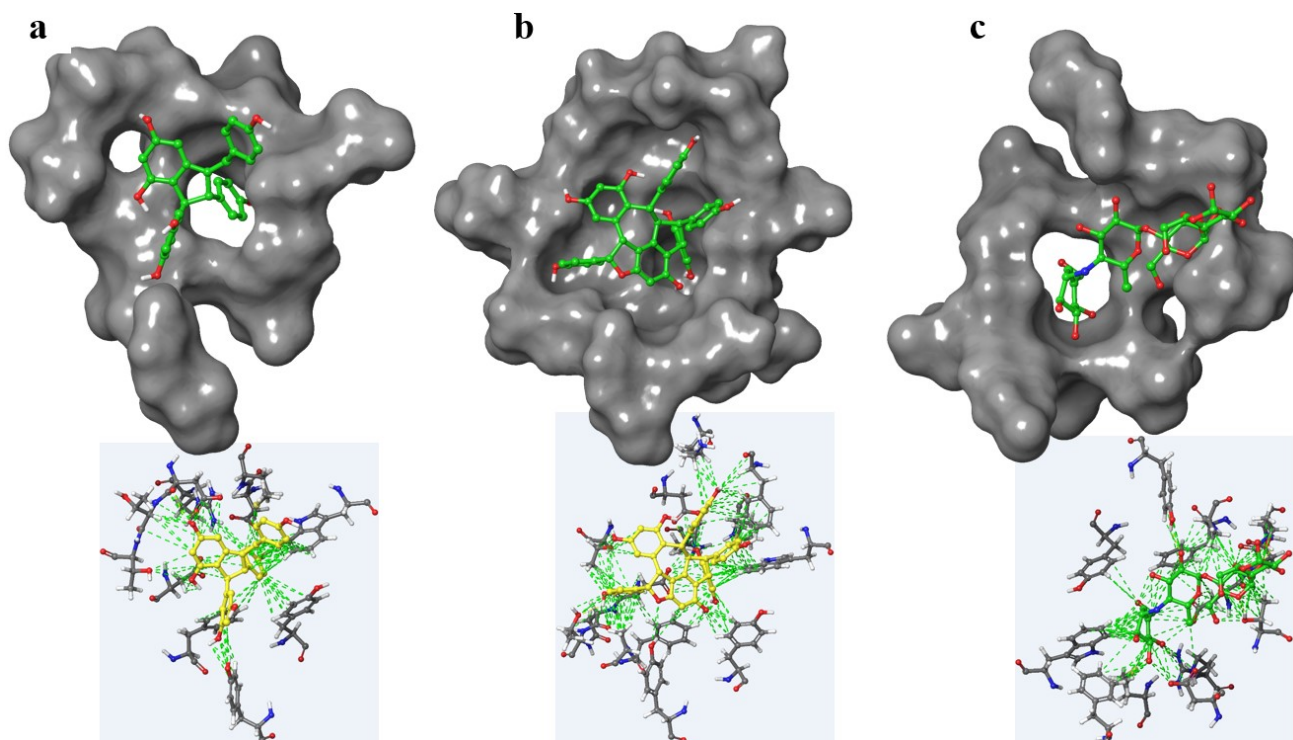

**Fig. S3.** Molecular docking of ampelopsin D (a), suffruticosol B (b) and acarbose (c) in the region of the active site of the protein (PDB: 2QMJ).

## Supplementary data

The NMR and MS data of the phytochemicals (**1-10**) isolated from *POSC* are as follows.

### (1) (E)-Resveratrol 3,5-*O*- $\beta$ -diglucoside

ESI-MS  $m/z$  553  $[M+H]^+$  ( $C_{26}H_{32}O_{13}$ ).  $^1H$  NMR (600 MHz, MeOD)  $\delta_H$ : 7.42 (2H, d,  $J = 8.5$  Hz, H-2', 6'), 7.11 (1H, d,  $J = 16.0$  Hz, H-8), 6.98 (2H, brs, H-2, 6), 6.93 (1H, d,  $J = 16.0$  Hz, H-7), 6.80 (2H, d,  $J = 8.5$  Hz, H-3', 5'), 6.49 (1H, overlapped, H-4), 4.97 (2H, d,  $J = 7.5$  Hz, H-1'', 1'''), 3.97 (2H, d,  $J = 11.0$  Hz, H-6a'', 6a'''), 3.30~3.78 (10H, Glu);  $^{13}C$  NMR (151 MHz, MeOD)  $\delta_C$ : 160.2 (C-4'), 158.6 (C-3, 5), 141.4 (C-1), 130.7 (C-), 130.6 (C-8), 130.2 (C-2', 6'), 129.0 (C-1'), 126.3 (C-7), 116.5 (C-3', 5'), 109.7 (C-2, 6), 104.8 (C-4), 102.3 (C-1'', 1'''), 78.3 (C-3'', 3'''), 78.0 (C-5'', 5'''), 74.9 (C-2'', 2'''), 71.7 (C-4'', 4'''), 62.7 (C-6'', 6''').

### (2) Paeoniflorin

ESI-MS  $m/z$  481  $[M+H]^+$  ( $C_{23}H_{28}O_{11}$ ).  $^1H$  NMR (600 MHz, MeOD)  $\delta_H$ : 8.05 (2H, d,  $J = 7.5$  Hz, H-2'', 6''), 7.61 (1H, t,  $J = 7.5$  Hz, H-4''), 7.48 (2H, t,  $J = 7.5$  Hz, H-3'', 5''), 5.44 (1H, s, H-9), 4.74 (1H, overlapped, H-8), 4.54 (1H, d,  $J = 7.5$  Hz, H-1'), 3.86 (1H, d,  $J = 11.5$  Hz, Hb-6'), 3.62 (1H, d,  $J = 8.5$  Hz, Ha-6'), 3.20~3.40 (4H, overlapped, H-3', 5', 2', 4'), 2.59 (1H, d,  $J = 6.0$  Hz, H-5), 2.49 (1H, m, Hb-6), 2.20 (1H, d,  $J = 12.5$  Hz, Hb-1), 1.96 (1H, d,  $J = 12.0$  Hz, Ha-6), 1.82 (1H, d,  $J = 12.5$  Hz, Ha-1), 1.37 (3H, s, H-10);  $^{13}C$  NMR (151 MHz, MeOD)  $\delta_C$ : 168.0 (C-7''), 134.4 (C-4''), 131.1 (C-1''), 130.6 (C-2'', 6''), 129.6 (C-3'', 5''), 106.4 (C-4), 102.2 (C-9), 100.1 (C-1'), 89.3 (C-1), 87.2 (C-2), 78.0 (C-5'), 77.9 (C-3'), 74.9 (C-2'), 72.1 (C-7), 71.7 (C-4'), 62.8 (C-6'), 61.7 (C-8), 44.5 (C-3), 43.9 (C-5), 23.4 (C-6), 19.6 (C-10).

### (3) Ethyl gallate

ESI-MS  $m/z$  199  $[M+H]^+$  ( $C_9H_{10}O_5$ ).  $^1H$  NMR (600 MHz, MeOD)  $\delta_H$ : 7.08 (2H, s, H-2, 6), 4.30 (2H, d,  $J = 7.0$  Hz, H-8), 1.37 (3H, t,  $J = 7.0$  Hz, H-9);  $^{13}C$  NMR (151 MHz, MeOD)  $\delta_C$ : 168.6 (C-7), 146.5 (C-3, 4), 139.7 (C-4), 121.8 (C-1), 110.0 (C-2, 6), 61.7 (C-8), 14.6 (C-9).

### (4) Suffruticosol A

ESI-MS  $m/z$  681  $[M+H]^+$  ( $C_{42}H_{32}O_9$ ).  $^1H$  NMR (600 MHz, MeOD)  $\delta_H$ : 7.14 (2H, d,  $J = 8.5$  Hz, H-2'', 6''), 6.99 (2H, d,  $J = 8.5$  Hz, H-2, 6), 6.72 (2H, d,  $J = 8.5$  Hz, H-3'', 5''), 6.52 (2H, d,  $J = 8.5$  Hz, H-2', 6'), 6.41 (2H, d,  $J = 8.5$  Hz, H-3, 5), 6.29 (1H, brs, H-12''), 6.23 (1H, s, H-12'), 6.15 (2H, d,  $J = 8.5$  Hz, H-3', 5'), 6.10 (1H, brs, H-12), 6.02 (2H, brs, H-10, 14), 5.96 (1H, brs, H-14''), 5.72 (1H, d,  $J = 12.0$  Hz, H-7''), 5.46 (1H, d,  $J = 3.0$  Hz, H-7'), 4.78 (1H, s, H-8), 4.39 (1H, d,  $J = 11.5$  Hz, H-8''), 3.97 (1H, m, H-8'), 3.72 (1H, d,  $J = 7.5$  Hz, H-7);  $^{13}C$  NMR (151 MHz, MeOD)  $\delta_C$ : 160.2 (C-11'), 159.3 (C-11, 13), 159.0 (C-4''), 156.7 (C-13''), 156.5 (C-4), 155.1 (C-13'), 155.0 (C-11''), 154.5 (C-4'), 148.4 (C-9), 144.7 (C-9'), 141.8 (C-9''), 135.5 (C-1), 133.9 (C-1'), 130.9 (C-1''), 130.8 (C-2', 6'), 130.7 (C-2, 6), 130.5 (C-2'', 6''), 126.9 (C-10''), 123.0 (C-14'), 117.3 (C-10'), 116.2 (C-3'', 5''), 115.4 (C-3, 5), 114.2 (C-3', 5'), 106.8 (C-10, 14), 105.9 (C-14''), 101.9 (C-12''), 101.4 (C-12), 96.2 (C-12'), 91.5 (C-7''), 61.1 (C-7), 54.6 (C-8), 49.6 (C-8''), 48.8 (C-8'), 39.7 (C-7').

### (5) Suffruticosol B

ESI-MS  $m/z$  681  $[M+H]^+$  ( $C_{42}H_{32}O_9$ ).  $^1H$  NMR (600 MHz, MeOD)  $\delta_H$ : 7.57 (2H, d,  $J = 8.5$  Hz, H-2'', 6''), 6.96 (2H, brd, H-2', 6'), 6.91 (2H, d,  $J = 8.5$  Hz, H-3'', 5''), 6.50 (2H, d,  $J = 8.5$  Hz, H-3', 5'), 6.27 (4H, overlapped, H-3, 5, 2, 6), 6.22 (2H, brd, H-10, 14), 6.19 (1H, s, H-12'), 6.17 (1H, s, H-12''), 6.14 (1H, s, H-12), 5.95 (1H, d,  $J = 2.0$  Hz, H-14''), 5.86 (1H, d,  $J = 11.5$  Hz, H-7''), 5.08 (1H, d,  $J = 11.5$  Hz, H-8'), 4.22 (1H, d,  $J = 11.5$  Hz, H-7'), 4.09 (2H, overlapped, H-8, 8'), 3.81 (1H, d,  $J = 6.0$  Hz, H-7);  $^{13}C$  NMR (151 MHz, MeOD)  $\delta_C$ : 160.2 (C-11'), 159.4 (C-11, 13), 159.1 (C-4''), 158.4 (C-13''), 157.2 (C-11''), 156.1 (C-4'), 156.1 (C-4), 155.7 (C-13'), 147.5 (C-9'), 147.5 (C-9), 142.4 (C-9''), 135.5 (C-1), 133.8 (C-1'), 133.1 (C-2', 6'), 130.9 (C-1''), 130.5 (C-2'', 6''), 129.5 (C-2, 6), 123.6 (C-14'), 122.9 (C-10''), 118.5 (C-10'), 116.5 (C-3'', 5''), 115.2 (C-3, 5), 114.7 (C-3', 5'), 107.3 (C-10, 14), 104.9 (C-12''), 103.7 (C-14''), 101.4 (C-12), 96.2 (C-12'), 91.1 (C-7''), 63.1 (C-7), 56.9 (C-8), 47.8 (C-8''), 46.5 (C-8'), 39.7 (C-7').

### (6) Trans- $\epsilon$ -viniferin

ESI-MS  $m/z$  455  $[M+H]^+$  ( $C_{28}H_{22}O_6$ ).  $^1H$  NMR (600 MHz, MeOD)  $\delta_H$ : 7.16 (2H, d,  $J = 8.6$  Hz, H-2,6), 7.11 (2H, d,  $J = 8.3$  Hz, H-2',6'), 6.77 (2H, d,  $J = 9.2$  Hz, H-3,5), 6.67 (2H, d,  $J = 8.8$  Hz, H-3',5'), 6.64 (1H, d,  $J = 2.0$  Hz, H-10'), 6.25 (1H, d,  $J = 2.0$  Hz, H-12'), 6.81 (1H, d,  $J = 16.0$  Hz, H-7'), 6.55 (1H, d,  $J = 16.0$  Hz, H-8'), 6.18 (1H, d,  $J = 2.0$  Hz, H-12), 6.15 (2H, d,  $J = 2.0$  Hz, H-10,14), 5.34 (1H, d,  $J = 6.5$  Hz, H-7), 4.35 (1H, d,  $J = 6.5$  Hz, H-8);  $^{13}C$  NMR (151 MHz, MeOD)  $\delta_C$ : 133.8 (C-1), 128.5 (C-2,6), 116.0 (C-3, 5), 157.9 (C-4), 94.8 (C-7), 57.5 (C-8), 147.4 (C-9), 107.3 (C-10), 159.6 (C-11,13), 101.9 (C-12), 107.4 (C-14), 130.2 (C-1'), 131.0 (C-2',6'), 115.7 (C-3', 5'), 158.4 (C-4'), 131.7 (C-7'), 126.5 (C-8'), 137.7 (C-9'), 108.9 (C-10'), 159.1 (C-11'), 96.7 (C-12'), 162.8 (C-13'), 120.5 (C-14').

**(7) Ampelopsin D**

ESI-MS  $m/z$  455  $[M+H]^+$  ( $C_{28}H_{22}O_6$ ).  $^1H$  NMR (600 MHz, MeOD)  $\delta_H$ : 7.01 (2H, d,  $J = 8.8$  Hz, H-2,6), 6.67 (2H, d,  $J = 8.8$  Hz, H-3,5), 4.18 (1H, brs, H-7), 4.05 (1H, brs, H-8), 6.05 (2H, d,  $J = 2.2$  Hz, H-10,14), 6.04 (1H, t,  $J = 2.2$  Hz, H-12), 7.09 (2H, d,  $J = 8.8$  Hz, H-2',6'), 6.57 (2H, d,  $J = 8.8$  Hz, H-3',5'), 6.95 (1H, d,  $J = 2.2$  Hz, H-7'), 6.18 (1H, d,  $J = 2.2$  Hz, H-12'), 6.70 (1H, d,  $J = 2.2$  Hz, H-14');  $^{13}C$  NMR (151 MHz, MeOD)  $\delta_C$ : 137.9 (C-1), 129.0 (C-2,6), 116.5 (C-3, 5), 156.7 (C-4), 59.9 (C-7), 59.0 (C-8), 150.0 (C-9), 106.5 (C-10,14), 159.2 (C-11,13), 101.4 (C-12), 130.2 (C-1'), 131.2 (C-2',6'), 115.9 (C-3', 5'), 157.4 (C-4'), 122.7 (C-7'), 143.8 (C-8'), 148.0 (C-9'), 124.7 (C-10'), 156.4 (C-11'), 103.7 (C-12'), 159.8 (C-13'), 98.5 (C-14').

**(8) Vateriferol**

ESI-MS  $m/z$  679  $[M+H]^+$  ( $C_{42}H_{30}O_9$ ).  $^1H$  NMR (600 MHz, MeOD)  $\delta_H$ : 6.74 (2H, d,  $J = 8.4$  Hz, H-2'',6''), 3.19 (1H, t,  $J = 10.0$  Hz, H-7''), 6.49 (2H, d,  $J = 8.6$  Hz, H-3'',5''), 4.18 (1H, d,  $J = 9.6$  Hz, H-8''), 5.76 (2H, d,  $J = 2.0$  Hz, H-10'',14''), 6.02 (1H, d,  $J = 2.1$  Hz, H-12''), 6.95 (2H, d,  $J = 8.6$  Hz, H-2,6), 6.86 (2H, d,  $J = 8.6$  Hz, H-3,5), 5.23 (1H, d,  $J = 3.9$  Hz, H-7), 3.92 (1H, dd,  $J = 10.4$  Hz,  $J = 3.9$  Hz, H-8), 6.69 (1H, s, H-12), 7.58 (2H, d,  $J = 8.6$  Hz, H-2',6'), 7.05 (2H, d,  $J = 8.4$  Hz, H-3',5'), 6.17 (1H, d,  $J = 2.5$  Hz, H-12'), 6.69 (1H, d,  $J = 2.5$  Hz, H-14');  $^{13}C$  NMR (151 MHz, MeOD)  $\delta_C$ : 134.5 (C-1), 131.1 (C-2,6), 116.1 (C-3, 5), 159.2 (C-4), 42.7 (C-7), 55.2 (C-8), 140.2 (C-9), 119.4 (C-10), 155.4 (C-11), 96.8 (C-12), 152.7 (C-13), 125.8 (C-14), 135.4 (C-1''), 132.4 (C-2'',6''), 115.5 (C-3'',5''), 156.9 (C-4''), 63.4 (C-7''), 59.6 (C-8''), 147.5 (C-9''), 107.7 (C-10'',14''), 158.8 (C-11'',13''), 101.5 (C-12''), 123.9 (C-1'), 130.7 (C-2',6'), 116.5 (C-3', 5'), 157.8 (C-4'), 152.6 (C-7'), 116.7 (C-8'), 134.3 (C-9'), 124.9 (C-10'), 156.2 (C-11'), 102.6 (C-12'), 155.6 (C-13'), 110.2 (C-14').

**(9) 4-Hydroxybenzoic acid**

ESI-MS  $m/z$  139  $[M+H]^+$  ( $C_7H_6O_3$ ).  $^1H$  NMR (600 MHz, MeOD)  $\delta_H$ : 7.85 (2H, d,  $J = 8.5$  Hz, H-2, 6), 6.79 (2H, d,  $J = 8.5$  Hz, H-3, 5).  $^{13}C$  NMR (151 MHz, MeOD)  $\delta_C$ : 170.2 (C-7), 163.3 (C-4), 133.0 (C-2, 6), 122.9 (C-1), 116.0 (C-3, 5).

**(10) 4-Hydroxybenzal-dehyde**

ESI-MS  $m/z$  123  $[M+H]^+$  ( $C_7H_6O_2$ ).  $^1H$  NMR (600 MHz, MeOD)  $\delta_H$ : 9.73 (1H, s, H-7), 7.74 (2H, d,  $J = 8.5$  Hz, H-2, 6), 6.88 (2H, d,  $J = 8.5$  Hz, H-3, 5);  $^{13}C$  NMR (151 MHz, MeOD)  $\delta_C$ : 192.8 (C-7), 165.4 (C-4), 130.2 (C-1), 133.5 (C-2, 6), 116.9 (C-3, 5).

The NMR spectra ( $^1H$  NMR and  $^{13}C$  NMR) of these compounds were as follows.

1

MDZP-3  
1H NMR MDZP-3 in MeOD

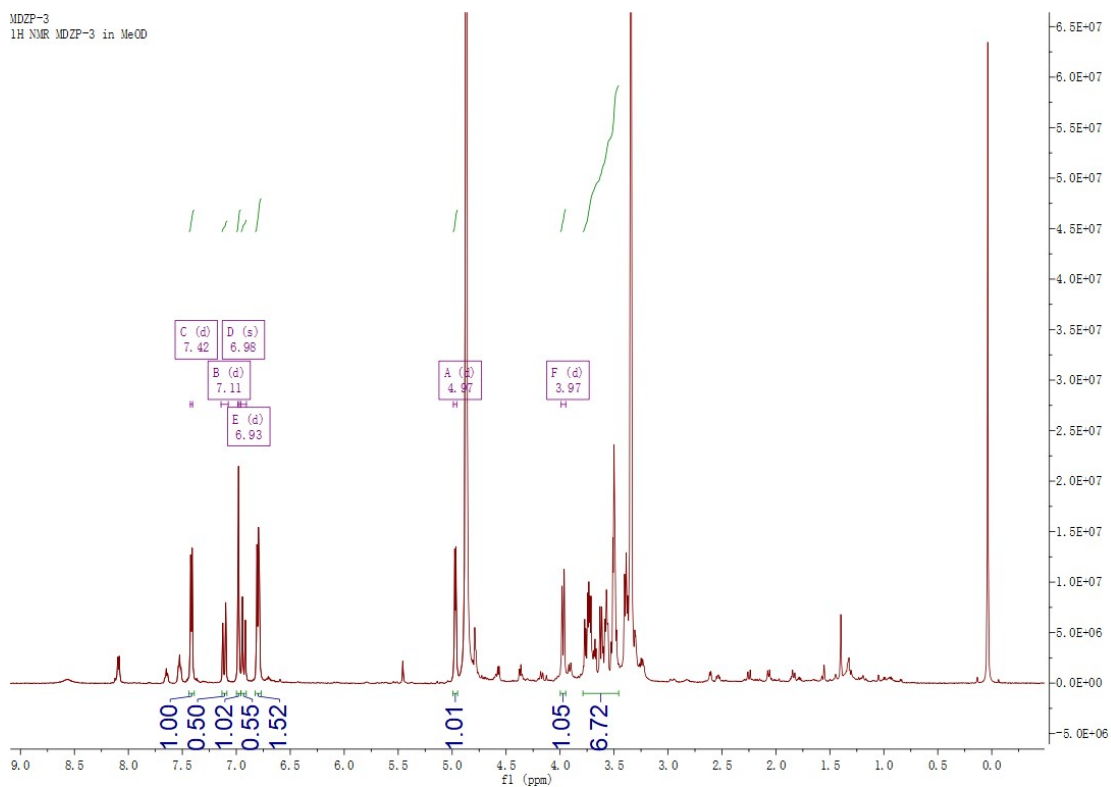

MDZP-3  
13C NMR MDZP-3 in MeOD

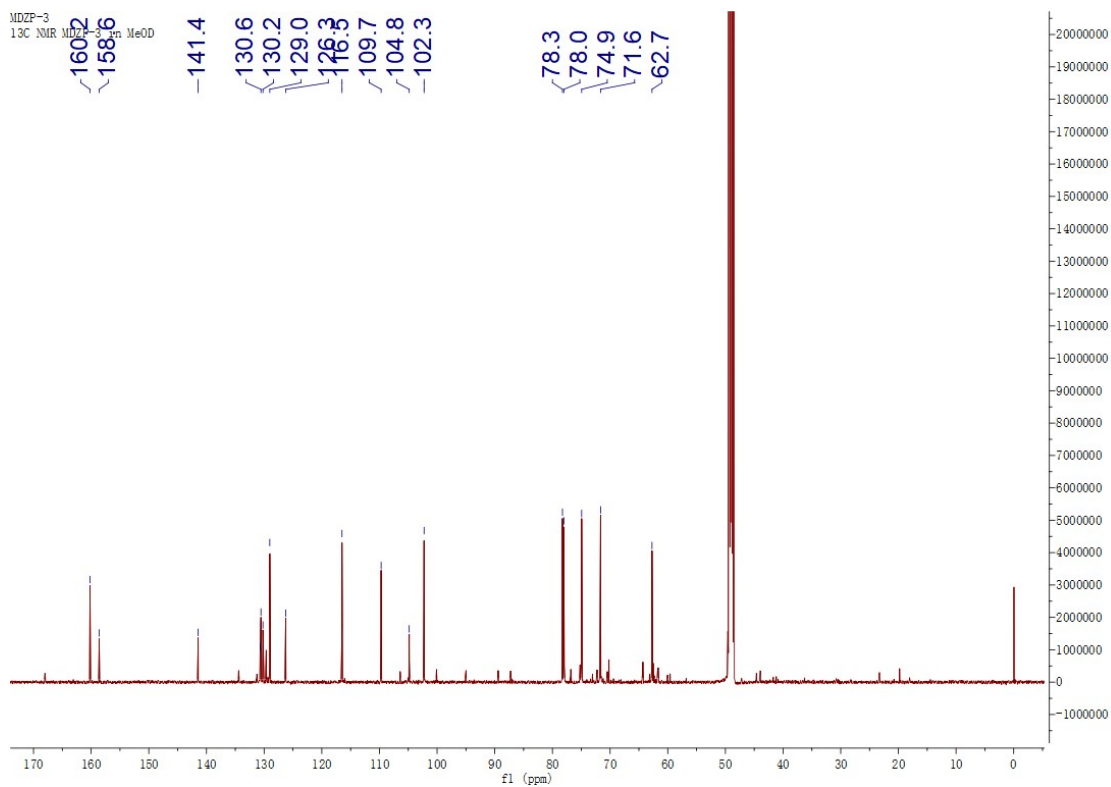

2



MDZF-2  
 1H NMR MDZF-2 in MeOD

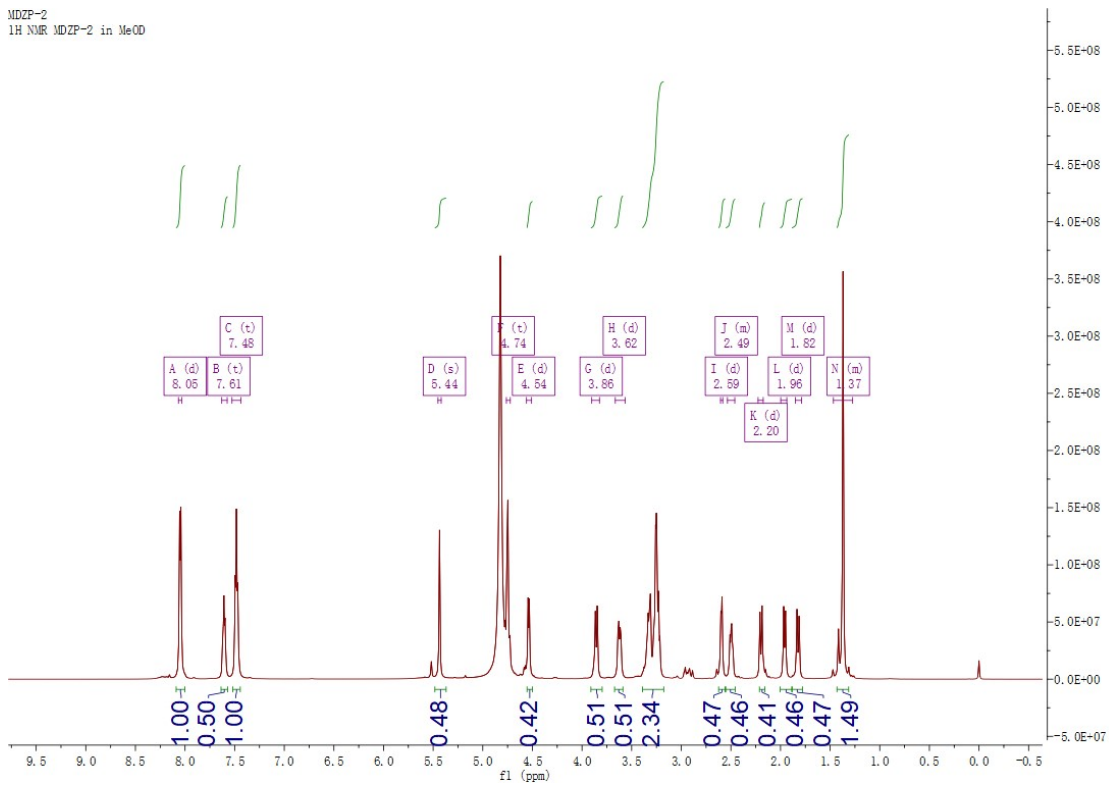

MDZF-2  
 13C NMR MDZF-2 in MeOD

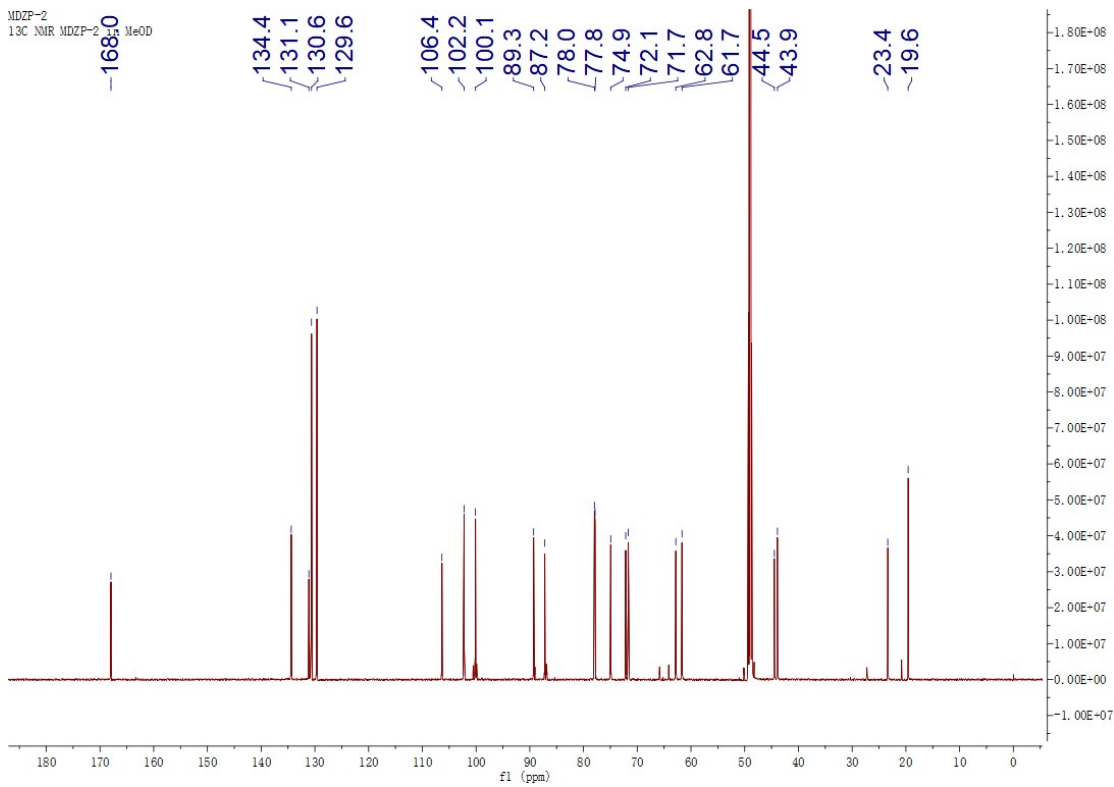

MDZF-6  
1H NMR MDZF-6 in MeOD

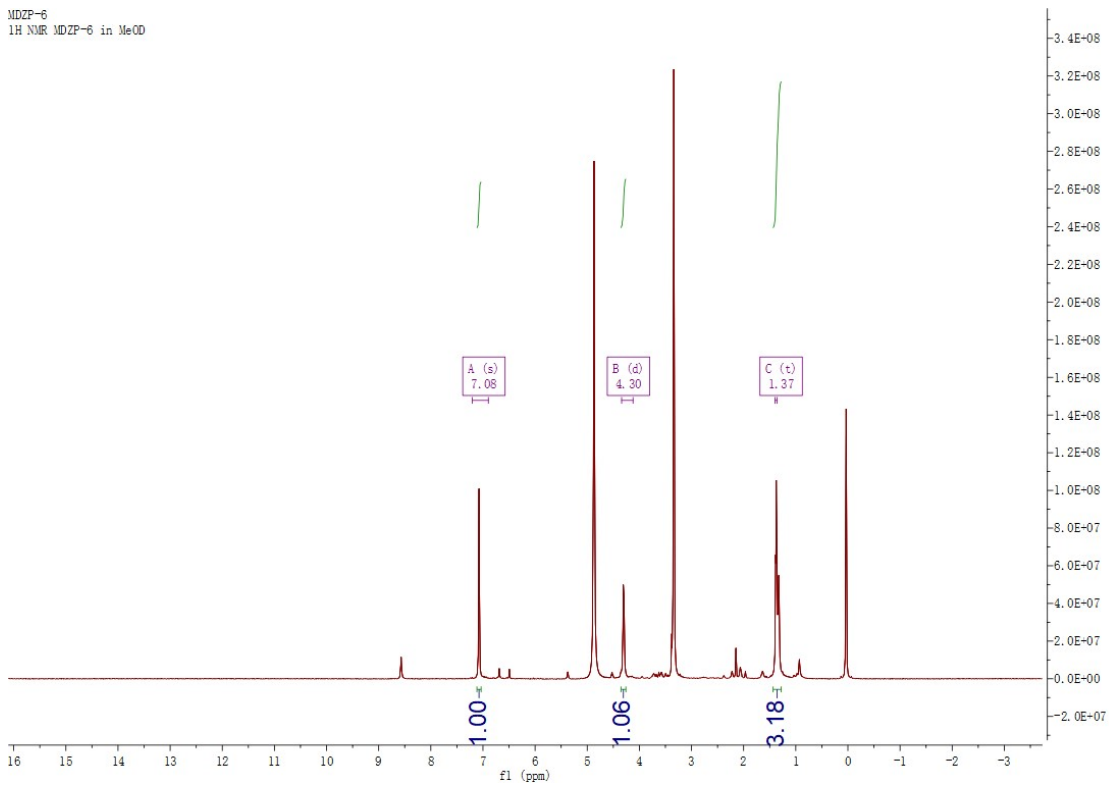

MDZF-6  
13C NMR MDZF-6 in MeOD

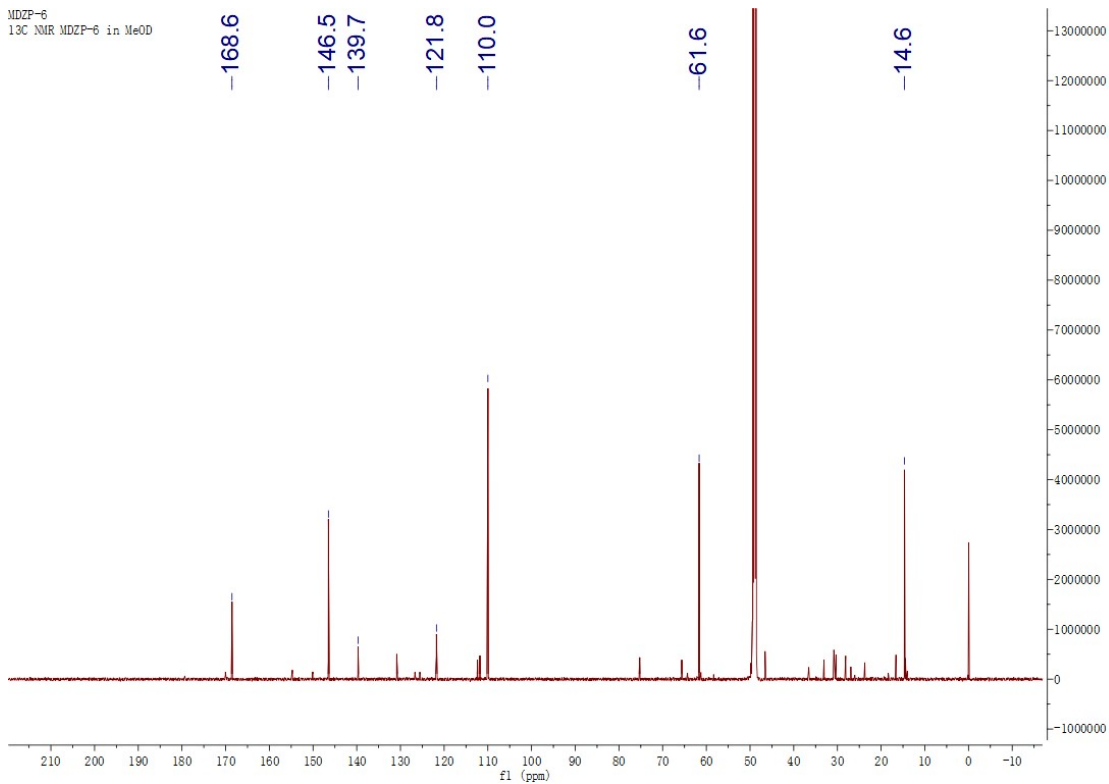

MDZF-1  
 1H NMR MDZF-1 in MeOD

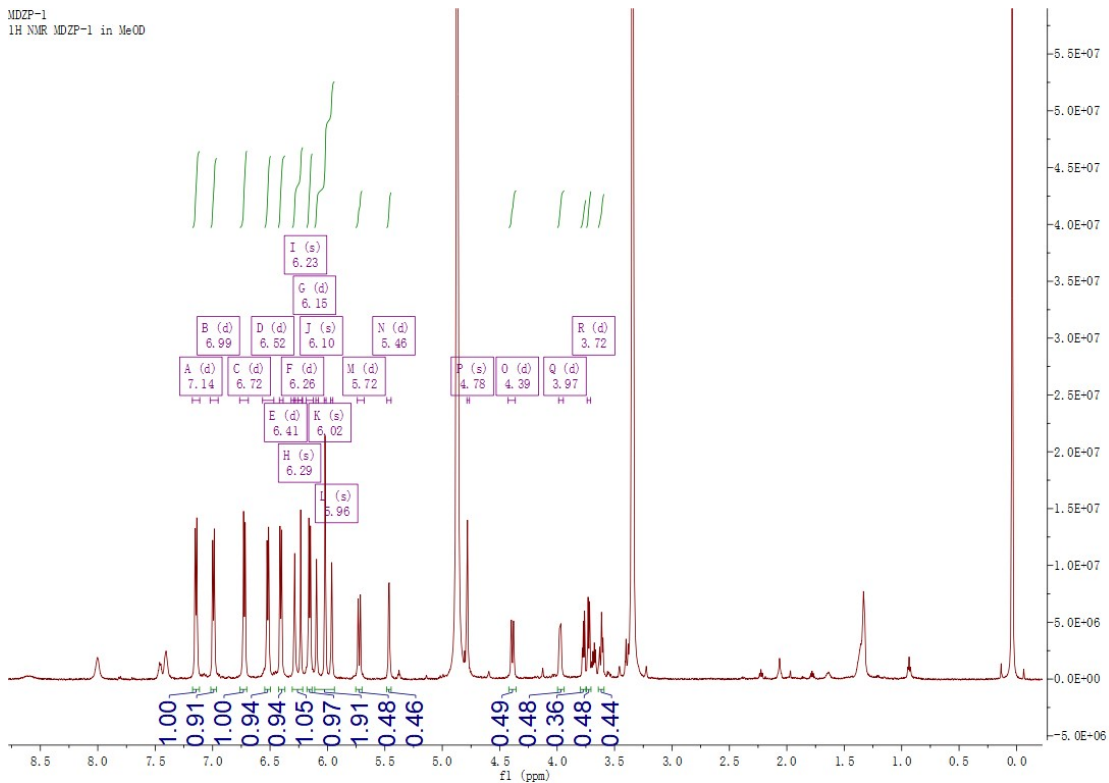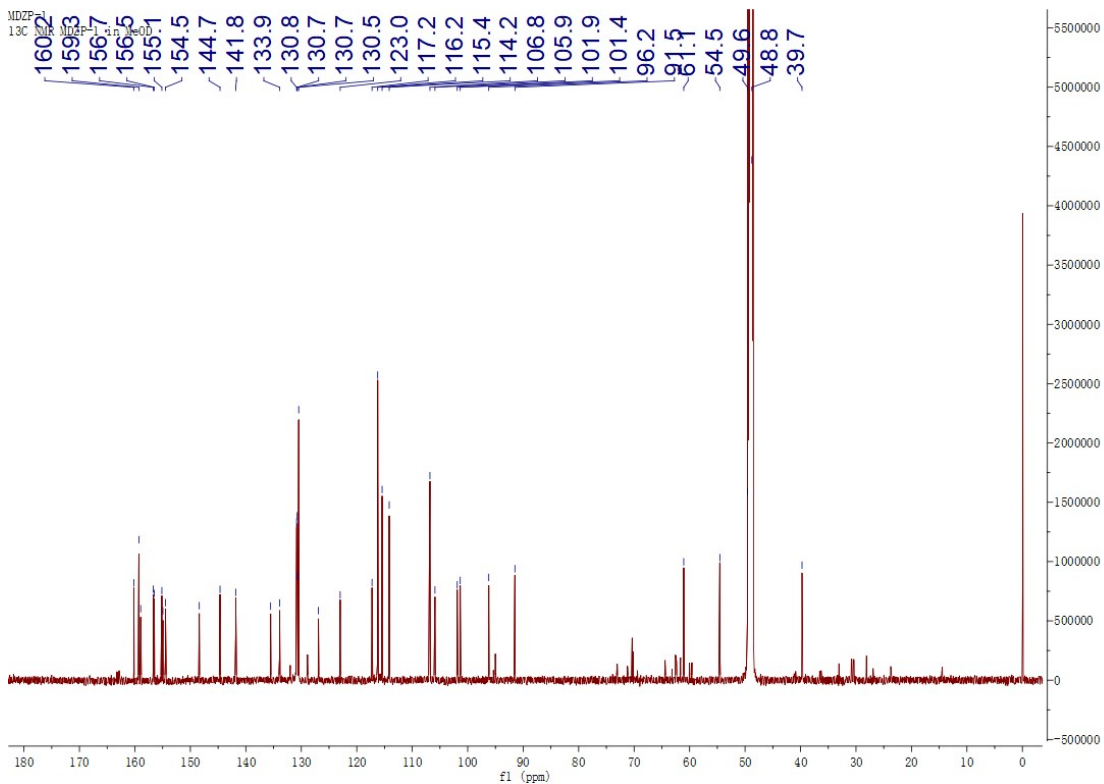

MDZF-5  
1H NMR MDZF-5 in MeOD

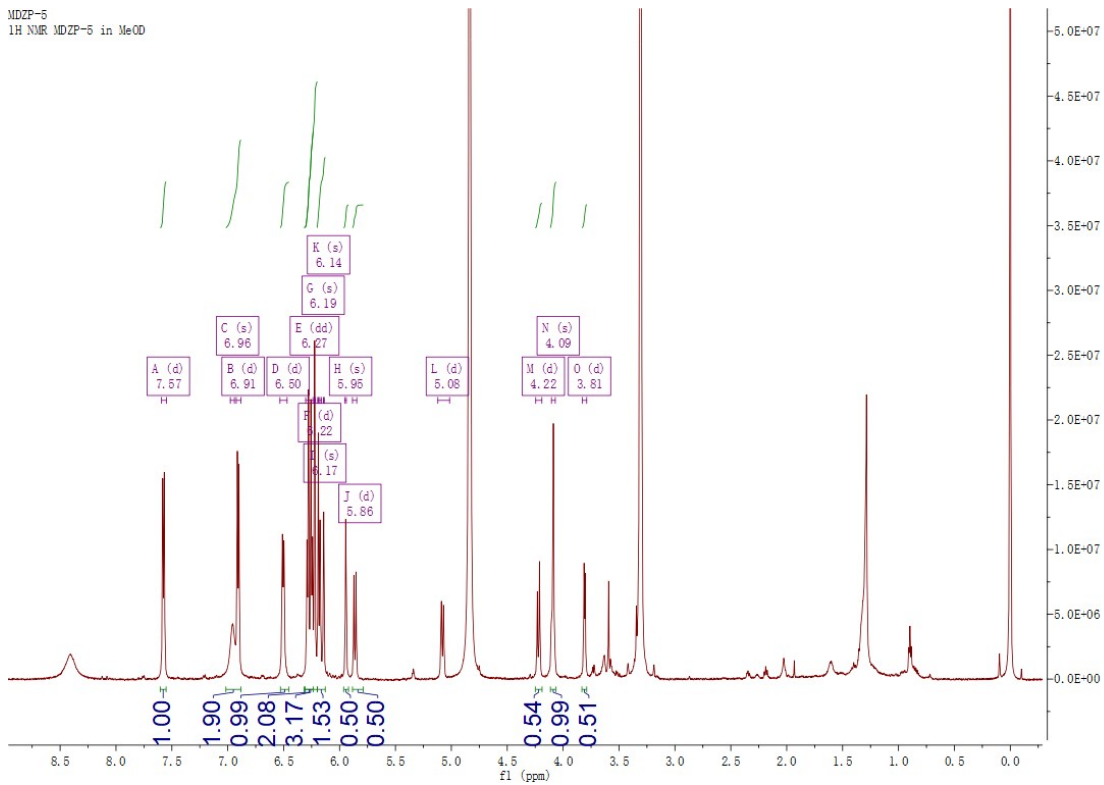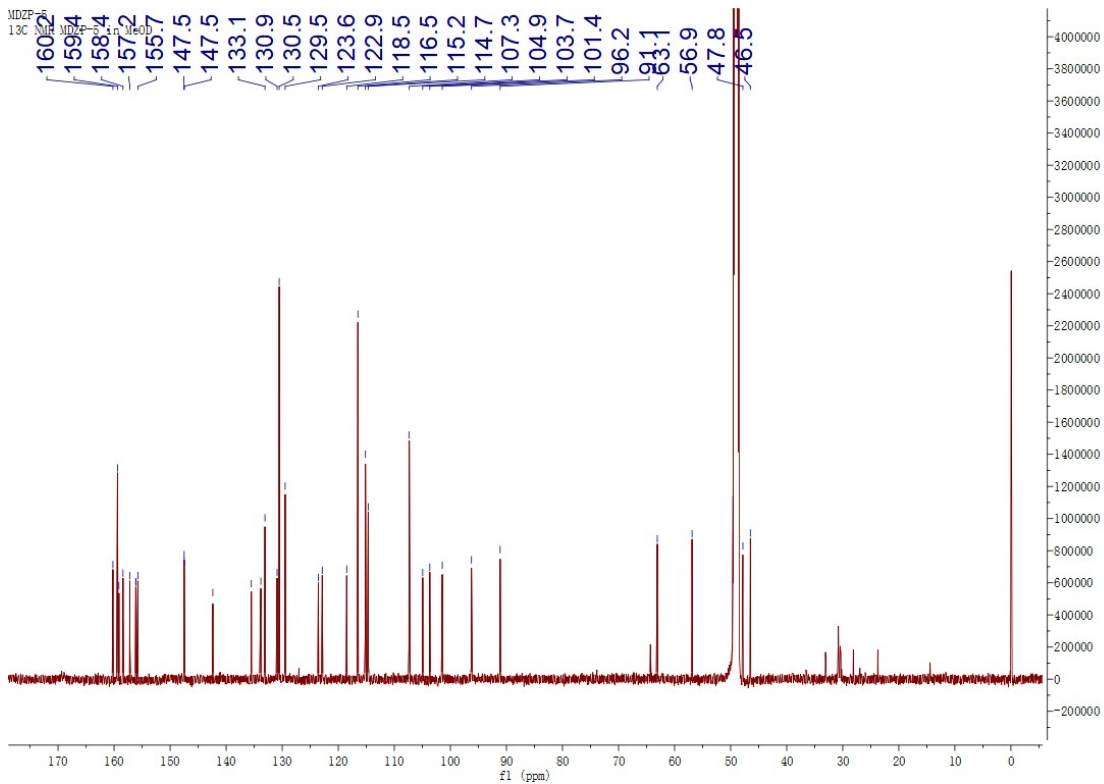

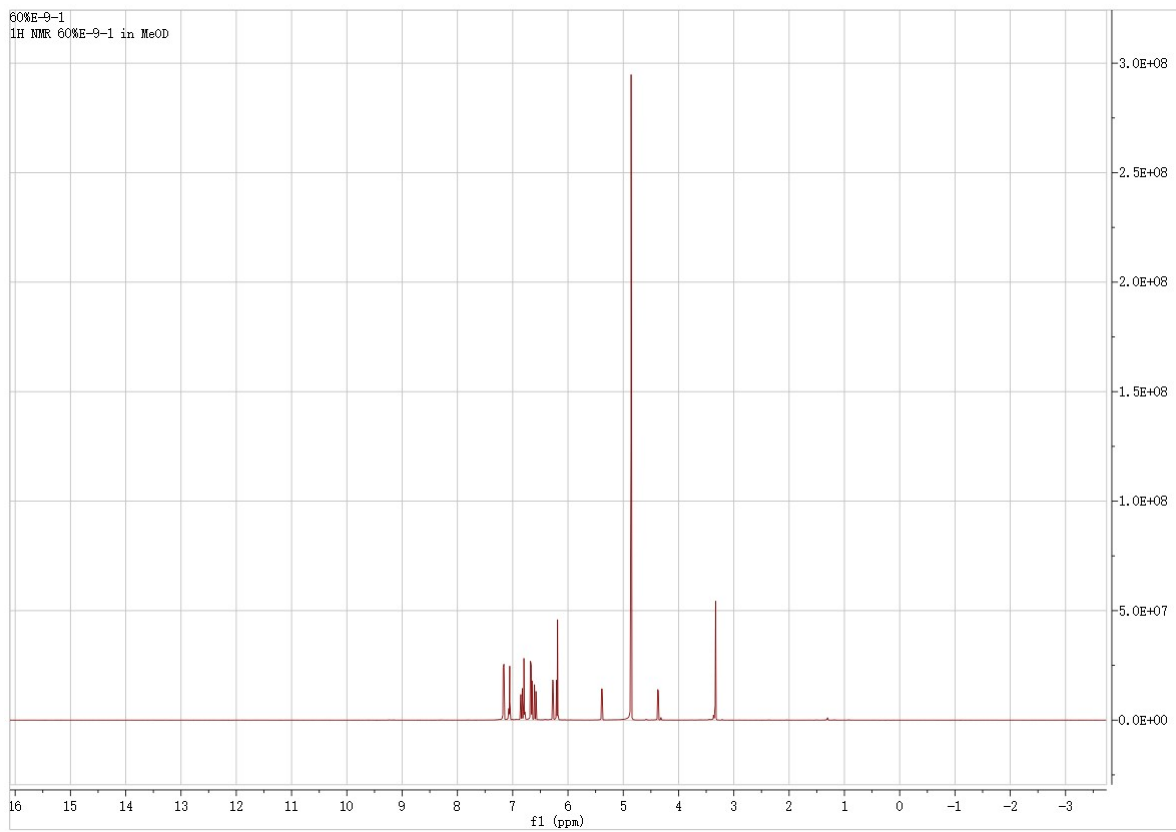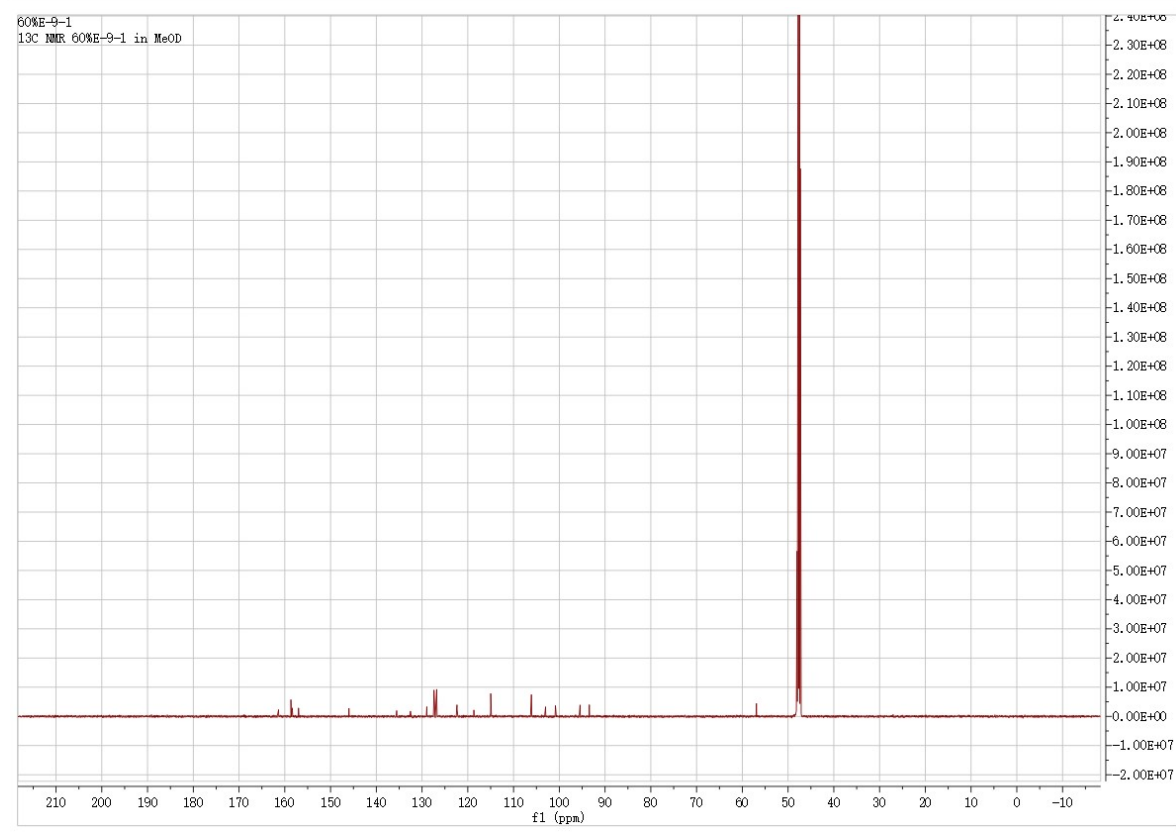

60%E-10-3  
1H NMR 60%E-10-3 in MeOD

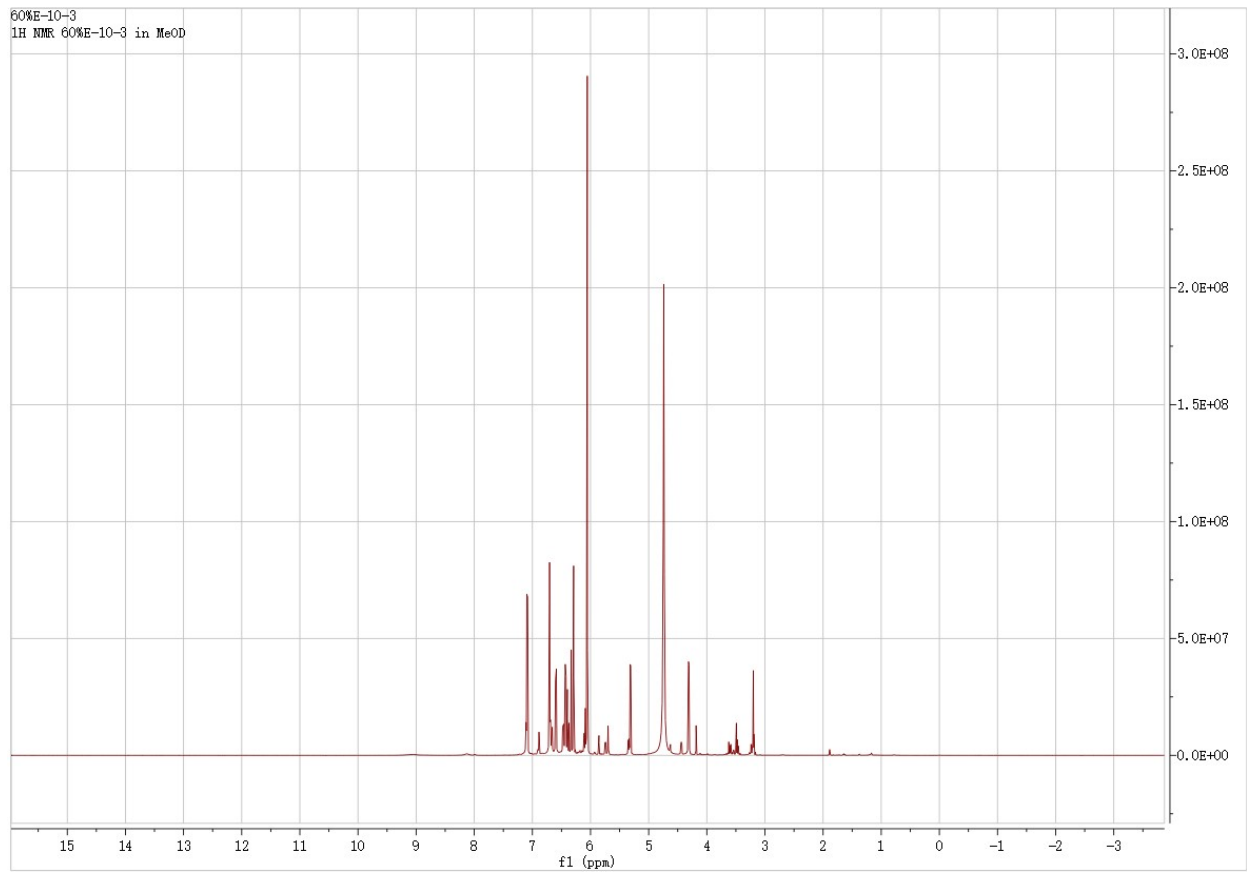

60%E-10-3  
13C NMR 60%E-10-3 in MeOD

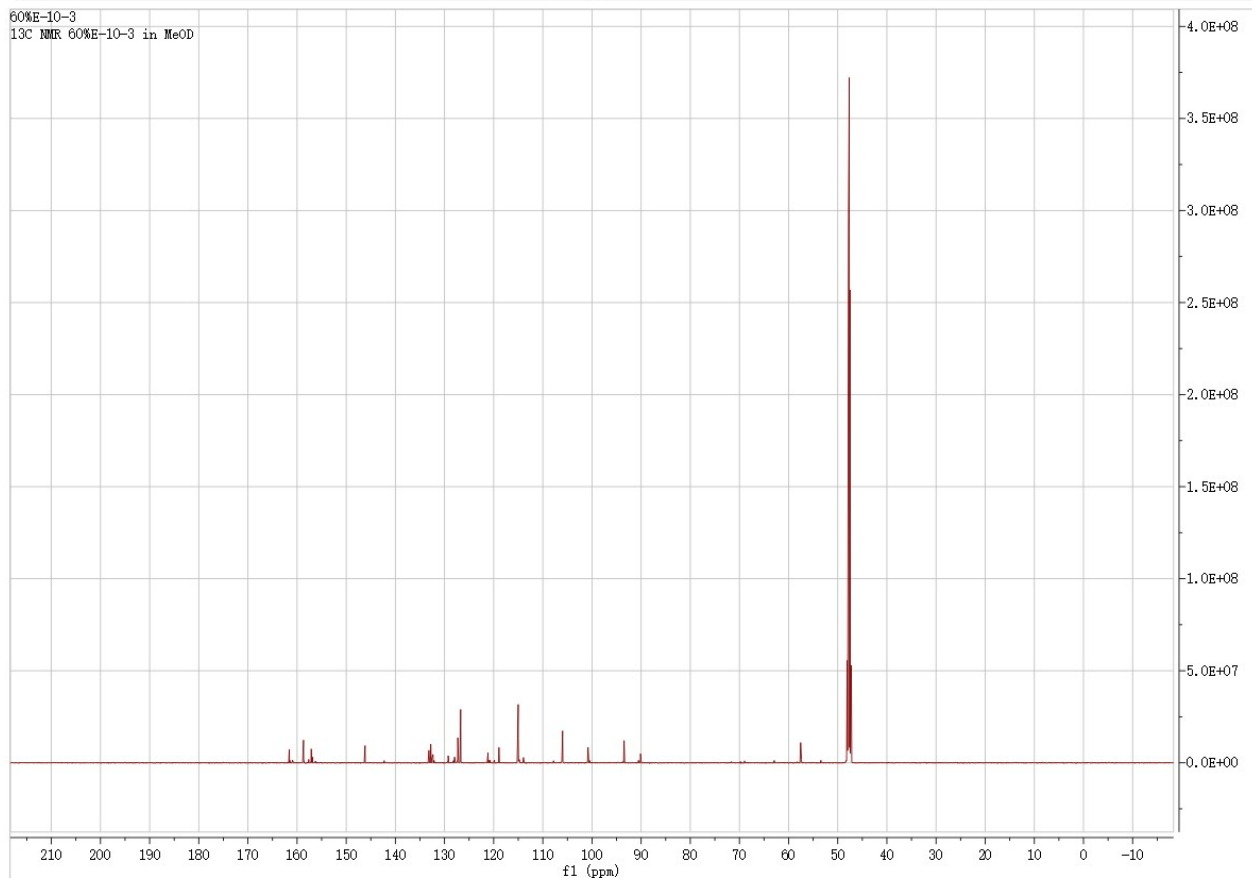

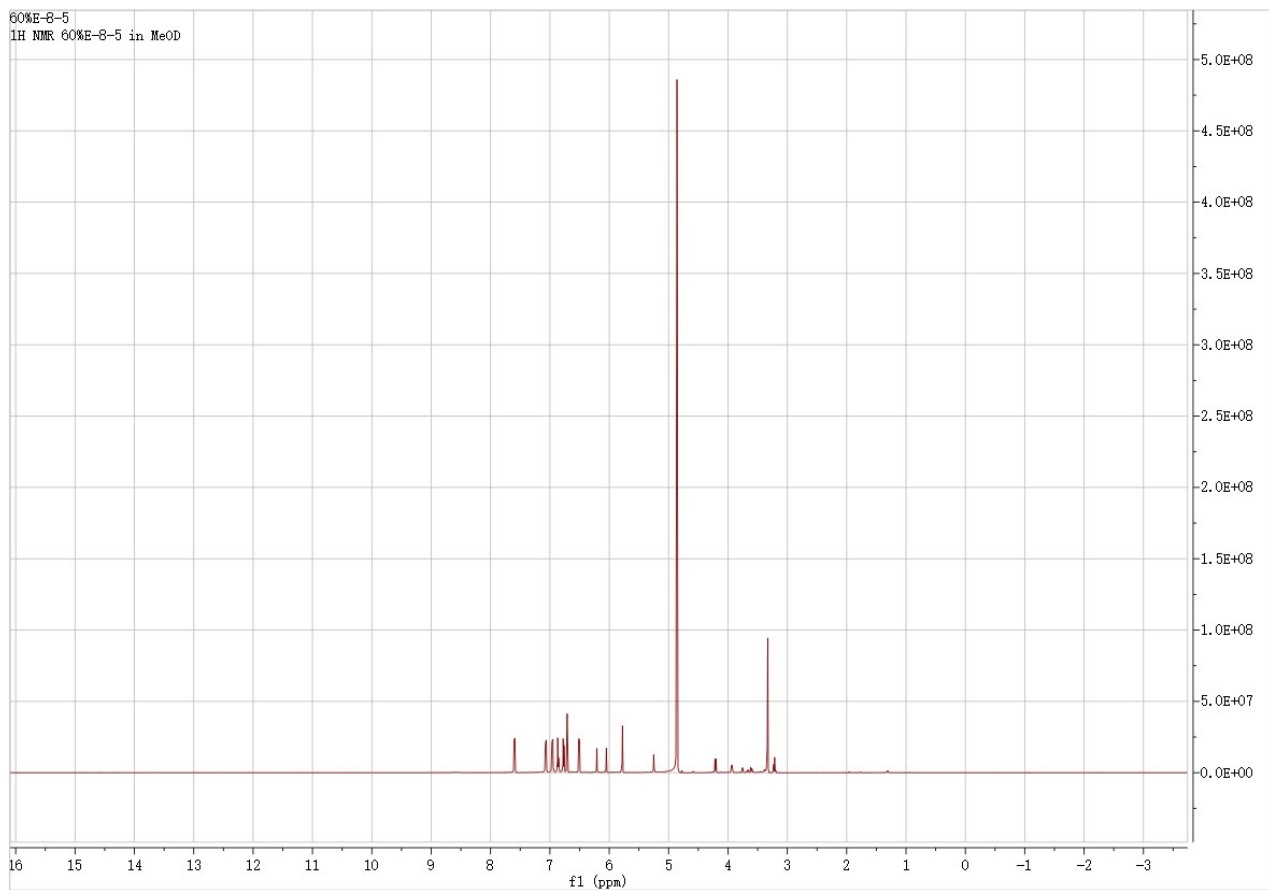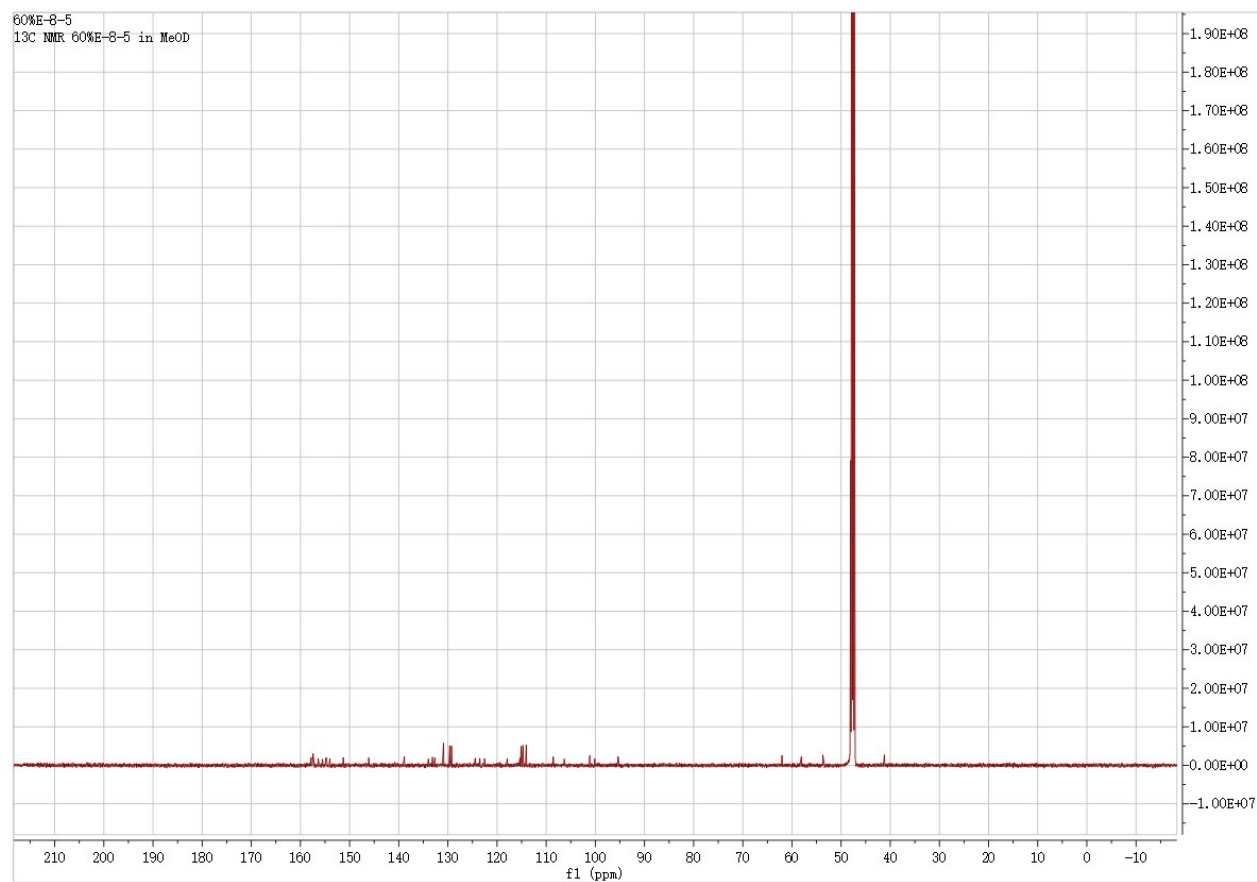

9

MDZF-7  
1H NMR MDZF-7 in MeOD

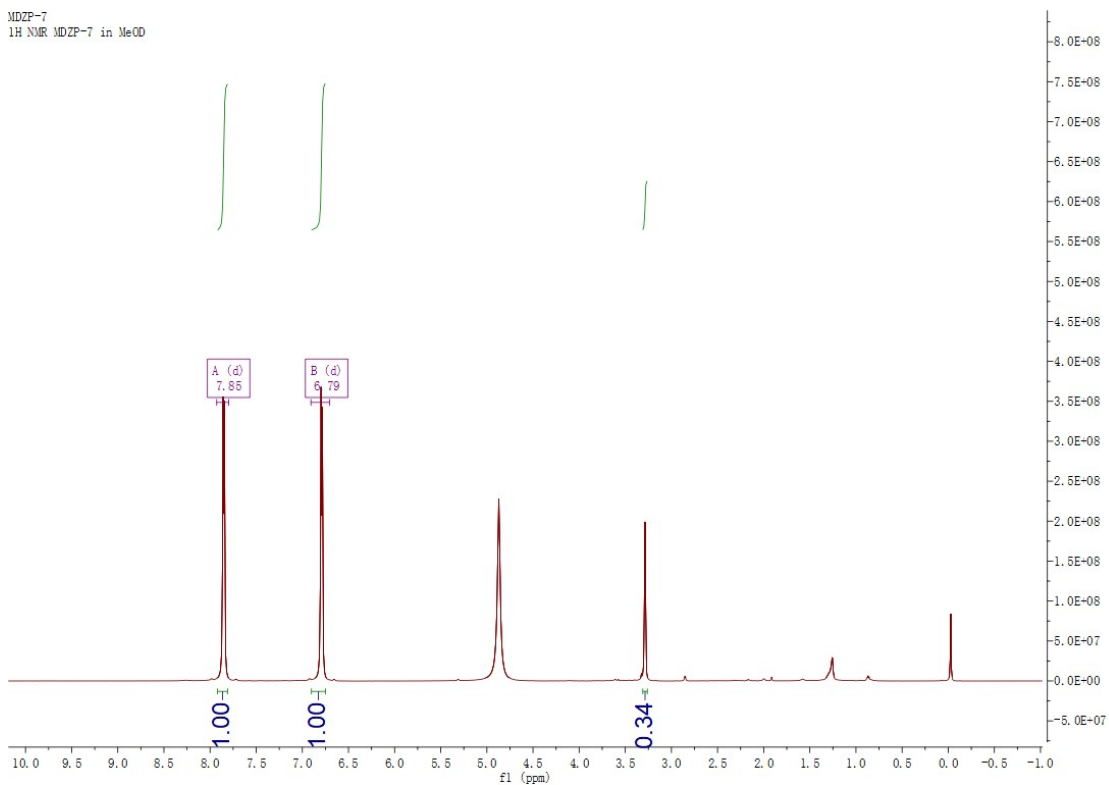

MDZF-7  
13C NMR MDZF-7 in MeOD

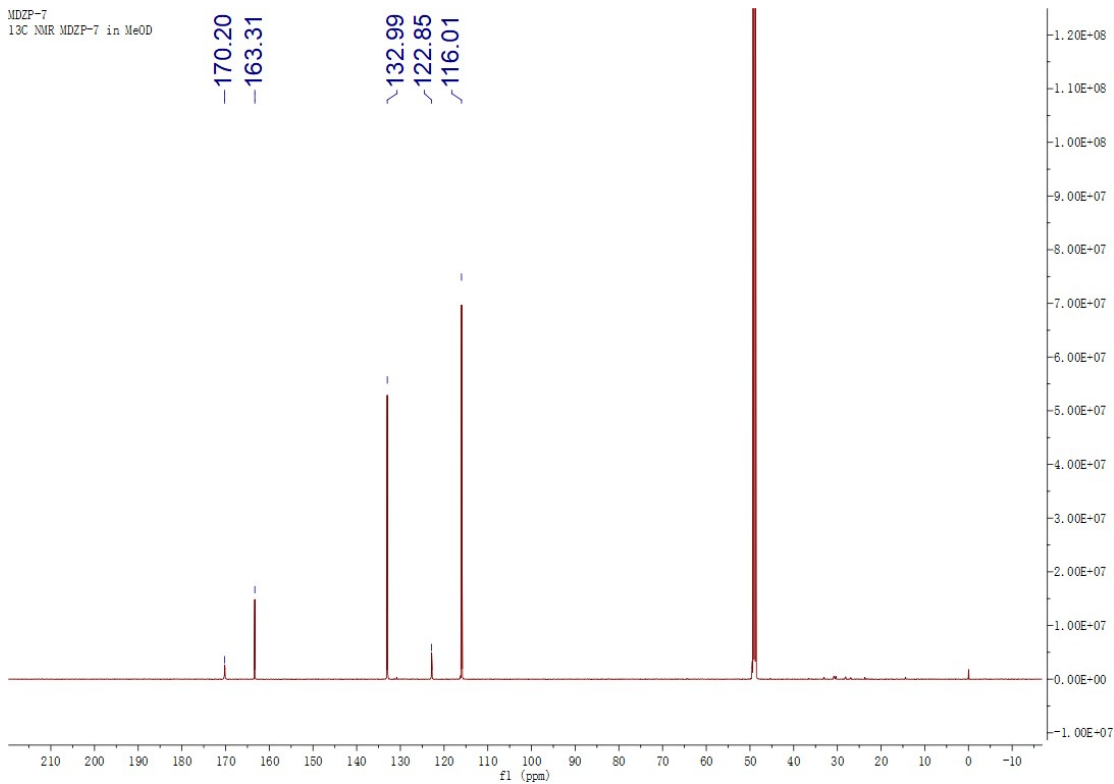



# 10

MDZF-4  
1H NMR MDZF-4 in MeOD

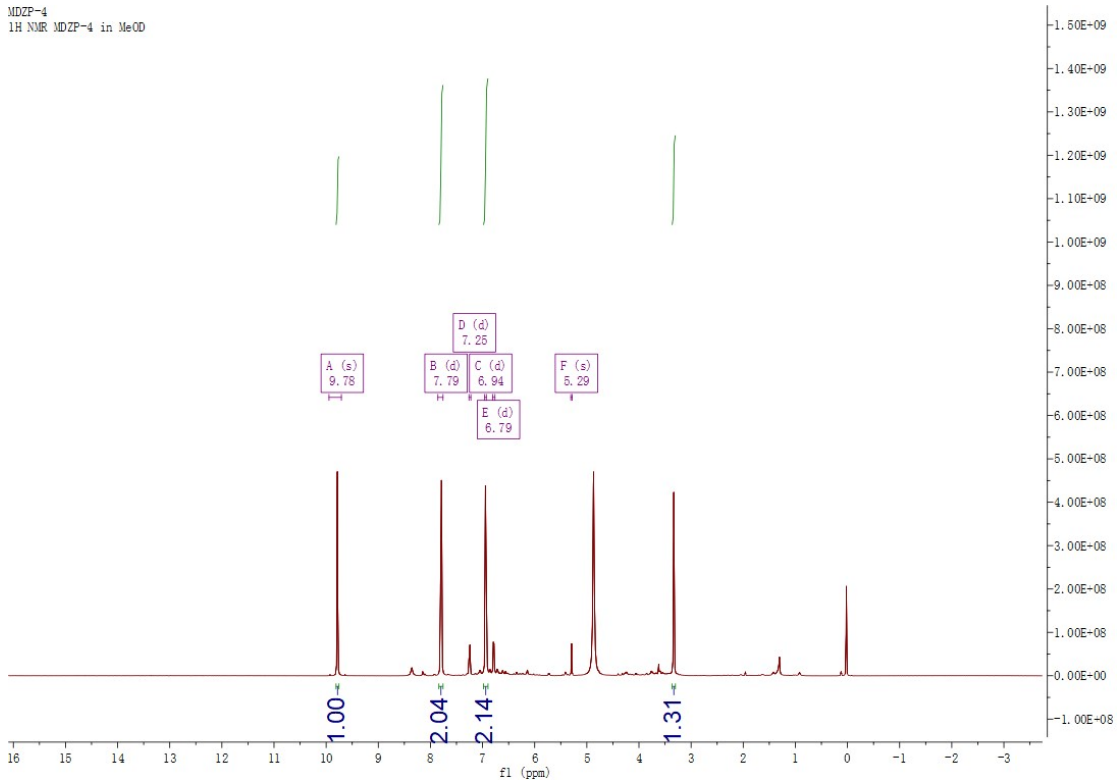

MDZF-4  
13C NMR MDZF-4 in MeOD

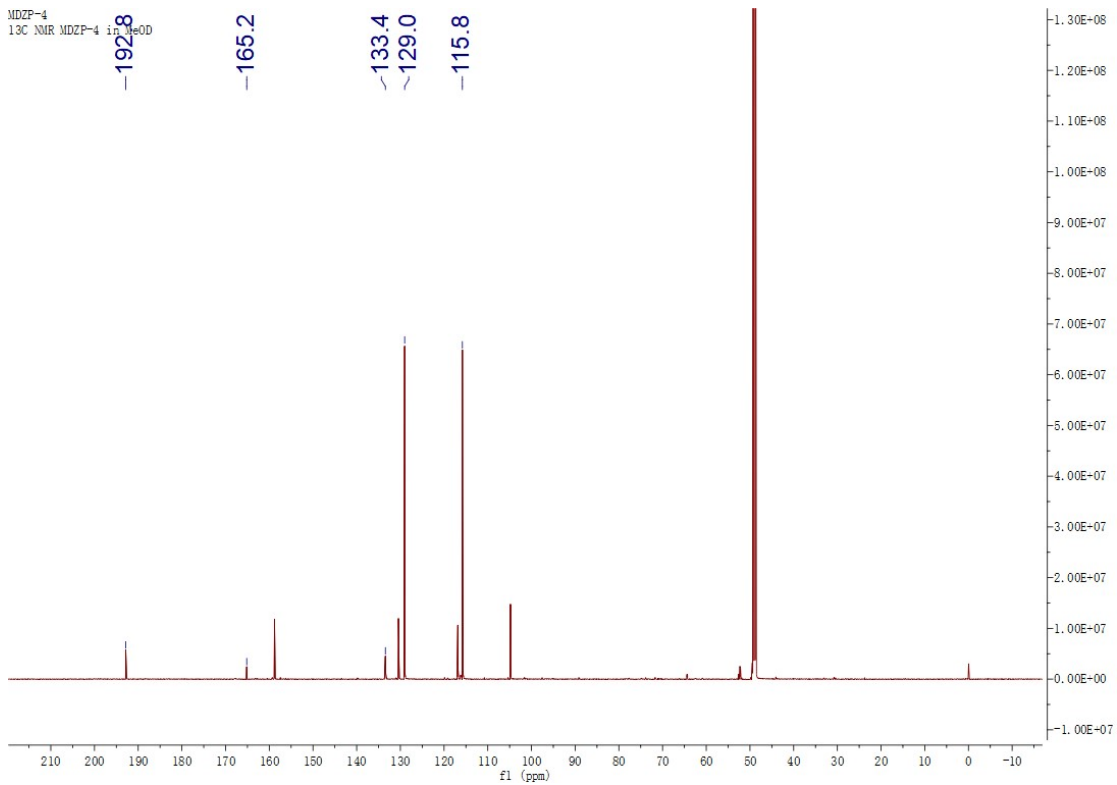

Supplement: d1fo02341a1.pdf [file d1fo02341a1.pdf]
